# Supplementary material
Source: Springer Nature journal article supplement (https://www.springermedizin.de/resource/supplementary/12916_2010_313_MOESM16_ESM.pdf/9599614)
Supplement: MOESM16 [file 9599614]

Antioxidant-rich diet group

Kiwifruit group

Control group

8 weeks intervention

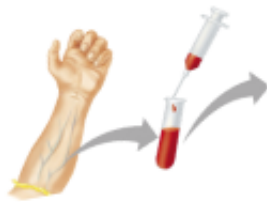

whole blood total RNA

Quality cheque of RNA

cRNA (including Globin mRNA reduction)

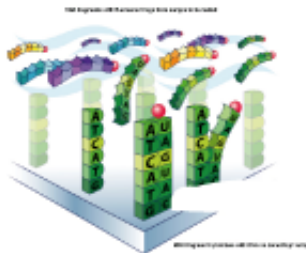

Hybridizing labelled cRNA to  
Affymetrix Human Genome U133 PLUS 2.0

Scanning of arrays

Quality control of raw data (CEL-files)

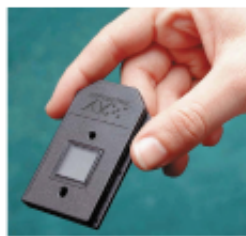

RNA normalization and  $\log_2$ -transformation

Computing  $\log_2$  ratios (after/before)

Identifying differentially regulated  
gene-transcripts (intervention groups vs control)

Limma:

Identifying the most differentially  
expressed genes,  
unadjusted p values <5%.  
Will include some false positives.

BAMarray

Identifying significantly  
differentially expressed  
genes adjusting for multiple  
testing

Lists of up- and down-regulated  
genes transcripts

- 1) Up-regulated (antiox. group)
- 2) Down-regulated (antiox. group)
- 3) Up-regulated (kiwifruit group)
- 4) Down-regulated (kiwifruit group)

Identifying regulated gene sets  
(GSEA)

Threshold-free approach

- a) intervention groups vs controls
- b) post- vs pre intervention

Identifying regulated pathways  
/GO processes (J-express)

Exploring regulated genesets  
and references
